# Supplementary material
Source: MDPI journal article supplement (https://www.mdpi.com/2073-445X/13/4/557)
Supplement: s1 [file s1]

1 Table S1 Comparison of remotely interpreted land-use data with land survey data.

| Land-use type     | Area of remote sensing interpretation (S) | Area of survey data (T) | The proportion of area error to land survey area ((S-T)/T*100%) | User's accuracy |
|-------------------|-------------------------------------------|-------------------------|-----------------------------------------------------------------|-----------------|
| Cropland          | 17529                                     | 15071                   | 16.30%                                                          | 90.21%          |
| Woodland          | 2794                                      | 9553                    | -70.75%                                                         | 87.43%          |
| Grassland         | 23447                                     | 20242                   | 15.83%                                                          | 92.04%          |
| Construction land | 2490                                      | 3504                    | -28.94%                                                         | 86.83%          |
| Water Area        | 1023                                      | 1081                    | -5.35%                                                          | 83.86%          |
| Unused land       | 4665                                      | 2497                    | 86.80%                                                          | 91.62%          |

Area error rate is 31% (the proportion of error area to land survey area).

2 Table S2 Categories of land use

| Land-use type      | First land survey |                                                                         | Second land survey |                                                                         | Third land survey |                                                                         |
|--------------------|-------------------|-------------------------------------------------------------------------|--------------------|-------------------------------------------------------------------------|-------------------|-------------------------------------------------------------------------|
|                    | Land code         | Land type                                                               | Land code          | Land type                                                               | Land code         | Land type                                                               |
| Cropland           | 11                | Paddy fields                                                            |                    |                                                                         |                   |                                                                         |
|                    | 12                | fields on hill tops which depend on rains for water                     | 011                | Paddy fields                                                            | 0101              | Paddy fields                                                            |
|                    | 13                | irrigated land                                                          | 012                | irrigated land                                                          | 0102              | irrigated land                                                          |
|                    | 14                | dry land                                                                | 013                | dry land                                                                | 0103              | dry land                                                                |
|                    | 15                | vegetable field                                                         |                    |                                                                         |                   |                                                                         |
|                    | 21                | Orchards                                                                | 021                | Orchards                                                                | 0201              | Orchards                                                                |
|                    | 25                | Other Gardens                                                           |                    |                                                                         |                   |                                                                         |
|                    | 22                | mulberry field                                                          | 023                | Other Gardens                                                           | 0204              | Other Gardens                                                           |
|                    | 87                | A ridge in sloping farmland used for water storage and slope protection | 123                | A ridge in sloping farmland used for water storage and slope protection | 1203              | A ridge in sloping farmland used for water storage and slope protection |
|                    | 63                | rural roads                                                             | 104                | rural roads                                                             | 1006              | rural roads                                                             |
| Woodland           | 77                | ditch                                                                   | 117                | ditch                                                                   | 1107              | ditch                                                                   |
|                    | 31                | closed forest land                                                      | 031                | closed forest land                                                      | 0301              | arbor forest                                                            |
|                    |                   |                                                                         |                    |                                                                         | 0302              | bamboo forest                                                           |
|                    | 32                | shrub forest                                                            | 032                | shrub forest                                                            | 0305              | shrub forest                                                            |
|                    | 33                | scatterd woodland                                                       |                    |                                                                         |                   |                                                                         |
|                    | 34                | un-closed afforestation land                                            | 033                | other wooded land                                                       | 0307              | other wooded land                                                       |
|                    | 35                | slash                                                                   |                    |                                                                         |                   |                                                                         |
| Grassland          | 36                | nursery land                                                            |                    |                                                                         |                   |                                                                         |
|                    | 41                | natural grassland                                                       | 041                | natural grassland                                                       | 0401              | natural grassland                                                       |
|                    | 42                | artificial grassland                                                    | 042                | artificial grassland                                                    | 0403              | artificial grassland                                                    |
|                    | 43                | other grassland                                                         | 043                | other grassland                                                         | 0404              | other grassland                                                         |
| Construct ion land | 81                | barren grassland                                                        |                    |                                                                         |                   |                                                                         |
|                    | 50A               | cities                                                                  | 201                | cities                                                                  | 201               | cities                                                                  |
|                    | 51B               | towns                                                                   | 202                | towns                                                                   | 202               | towns                                                                   |
|                    | 52                | rural settlements                                                       | 203                | villages                                                                | 203               | villages                                                                |

| Land-use type | First land survey |                                     | Second land survey |                                  | Third land survey |                                  |
|---------------|-------------------|-------------------------------------|--------------------|----------------------------------|-------------------|----------------------------------|
|               | Land code         | Land type                           | Land code          | Land type                        | Land code         | Land type                        |
|               | 53                | separate industrial and mining land | 204                | mining sites                     | 204               | mining sites                     |
|               | 54                | saltpan                             |                    |                                  |                   |                                  |
|               | 55                | special land                        | 205                | special land                     | 205               | special land                     |
|               | 61                | railways                            | 101                | railways                         | 1001              | railways                         |
|               |                   |                                     |                    |                                  | 1002              | land for rail transit            |
|               | 62                | highway land                        | 102                | highway land                     | 1003              | highway land                     |
|               | 64                | civilian airport                    | 105                | airport site                     | 1007              | airport site                     |
|               | 65                | port and dock land                  | 106                | port and dock land               | 1008              | port and dock land               |
|               |                   |                                     | 107                | and for pipelines                | 1009              | and for pipelines                |
|               | 78                | hydraulic engineering land          | 118                | hydraulic engineering land       | 1109              | hydraulic engineering land       |
| Water area    | 71                | rivers                              | 111                | rivers                           | 1101              | rivers                           |
|               | 72                | lakes                               | 112                | lakes                            | 1102              | lakes                            |
|               | 73                | reservoirs                          | 113                | reservoirs                       | 1103              | reservoirs                       |
|               | 74                | ponds                               | 114                | ponds                            | 1104              | ponds                            |
|               | 75                | reed land                           |                    |                                  | 0304              | forest swamps                    |
|               |                   |                                     |                    |                                  | 0306              | scrub swamp                      |
|               |                   |                                     |                    |                                  | 0402              | swamp grassland                  |
|               | 76                | mudflat                             | 116                | inland mudflats                  | 1106              | inland mudflats                  |
|               | 83                | swamps                              | 125                | swamps                           | 1108              | swamps                           |
|               |                   |                                     | 122                | agricultural land for facilities | 1202              | agricultural land for facilities |
| Unused land   | 82                | saline soil                         | 124                | saline soil                      | 1204              | saline soil                      |
|               | 84                | sandy land                          | 126                | sandy land                       | 1205              | sandy land                       |
|               | 85                | bare ground                         | 127                | bare ground                      | 1206              | bare ground                      |
|               | 86                | bare gravel land                    |                    |                                  | 1207              | bare gravel land                 |
|               | 88                | other unused land                   |                    |                                  |                   |                                  |

3 Table S3 Parameters of ELAS under the four scenarios in Ningxia

| Scenario  |     | Cropland | Woodland | Grassland | Construction land | Water Area | Unused land |
|-----------|-----|----------|----------|-----------|-------------------|------------|-------------|
| 2000-2020 |     | 0.51     | 0.69     | 0.54      | 0.61              | 0.7        | 0.9         |
|           | ND  | 0.51     | 0.69     | 0.54      | 0.61              | 0.7        | 0.9         |
| 2020-2030 | RED | 0.6      | 0.72     | 0.6       | 0.85              | 0.6        | 0.78        |
|           | ELP | 0.3      | 0.5      | 0.65      | 0.5               | 0.7        | 0.92        |
|           | SD  | 0.3      | 0.76     | 0.62      | 0.65              | 0.75       | 0.88        |

4 Table S4 Parameters of cost matrix under the four scenarios (ND/RED/ELP/SD) in Ningxia

| Land-use type     | Cropland | Woodland | Grassland | Construction land | Water Area | Unused land |
|-------------------|----------|----------|-----------|-------------------|------------|-------------|
| Cropland          | 1\1\1\1  | 1\1\1\1  | 1\1\1\1   | 1\1\1\1           | 1\0\0\0    | 1\0\0\0     |
| Woodland          | 1\1\1\1  | 1\1\1\1  | 1\1\1\1   | 1\1\1\1           | 1\0\0\0    | 1\1\0\0     |
| Grassland         | 1\1\1\1  | 1\1\1\1  | 1\1\1\1   | 1\1\1\1           | 1\1\1\1    | 1\1\1\1     |
| Construction land | 1\0\0\1  | 1\0\1\1  | 1\0\1\1   | 1\1\1\1           | 1\0\0\0    | 1\0\0\0     |
| Water Area        | 1\0\1\1  | 1\0\1\1  | 1\1\1\1   | 1\1\1\1           | 1\1\1\1    | 1\0\0\1     |
| Unused land       | 1\1\1\1  | 1\1\1\1  | 1\1\1\1   | 1\1\1\1           | 1\0\1\1    | 1\1\1\1     |

0 means no conversion and 1 means conversion is possible

5 Fig S1 Comparison of simulated and actual LULC in 2020.

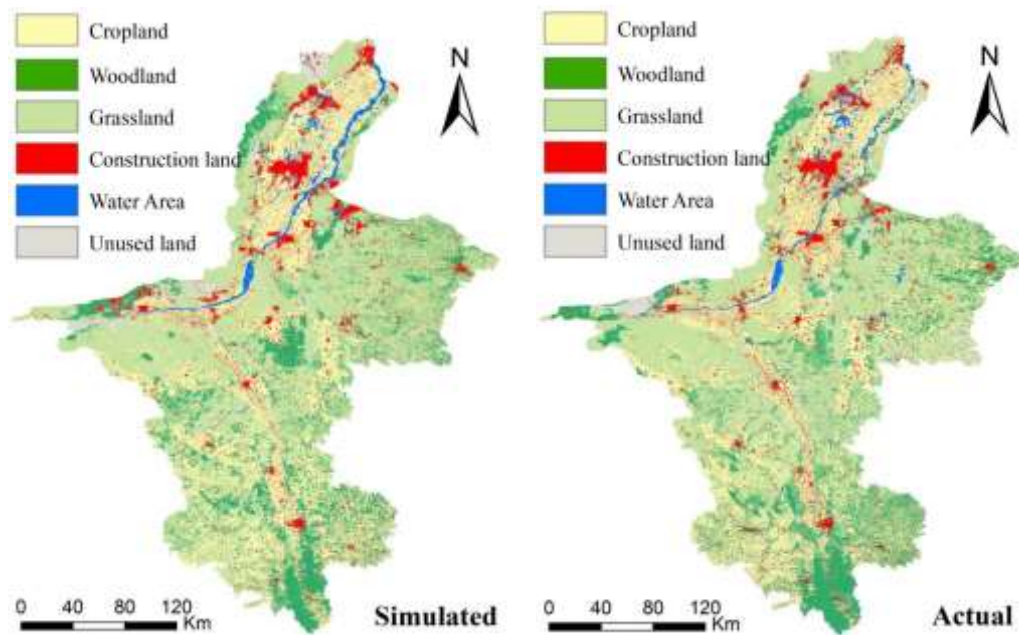

6 Table S5. The equivalent coefficients of ecosystem service provided by per unit area of terrestrial ecosystems in China.

| Ecosystem services      | Farmland | Forest | Grassland | Water area | Built-up land | Unused land |
|-------------------------|----------|--------|-----------|------------|---------------|-------------|
| Food production         | 1.00     | 0.33   | 0.43      | 0.49       | 0.00          | 0.02        |
| Raw material            | 0.39     | 2.98   | 0.36      | 0.33       | 0.00          | 0.04        |
| Gas regulation          | 0.72     | 4.32   | 1.50      | 0.94       | 0.00          | 0.06        |
| Climate regulation      | 0.97     | 4.07   | 1.56      | 4.65       | 0.00          | 0.13        |
| Water regulation        | 0.77     | 4.09   | 1.52      | 17.57      | 0.00          | 0.07        |
| Waste treatment         | 1.39     | 1.72   | 1.32      | 14.75      | 0.00          | 0.26        |
| Soil maintenance        | 1.47     | 4.02   | 2.24      | 0.77       | 0.00          | 0.17        |
| Biodiversity protection | 1.02     | 4.51   | 1.87      | 3.49       | 0.00          | 0.40        |
| Landscape aesthetics    | 0.17     | 2.08   | 0.87      | 4.50       | 0.00          | 0.24        |
| Total                   | 7.90     | 28.12  | 11.67     | 47.47      | 0.00          | 1.39        |

Source: Xie et al. (2003, 2008).

7 Table S6 Ecological service value per unit area of different terrestrial ecosystems in Ningxia, unit: CNY/ha/ year

| Primary Classification | Secondary Classification      | Cropland | Woodland | Grassland | Construct ion land | Water Area | Unused land |
|------------------------|-------------------------------|----------|----------|-----------|--------------------|------------|-------------|
| Supply services        | Food production               | 2327.50  | 768.08   | 1000.83   | 0.00               | 1144.52    | 46.55       |
|                        | Raw material                  | 907.73   | 6935.95  | 837.90    | 0.00               | 757.00     | 93.10       |
| Regulating service     | Air regulation                | 1675.80  | 10054.80 | 3491.25   | 0.00               | 2182.32    | 139.65      |
|                        | Climate regulation            | 2257.68  | 9472.93  | 3630.90   | 0.00               | 10813.57   | 302.58      |
|                        | Water conservation            | 1792.18  | 9519.48  | 3537.80   | -8094.82           | 40895.11   | 162.93      |
|                        | Waste treatment               | 3235.23  | 4003.30  | 3072.30   | -5702.38           | 34327.65   | 605.15      |
| Support services       | Soil formation and protection | 3421.43  | 9356.55  | 5213.60   | 0.00               | 1781.94    | 395.68      |
|                        | Biodiversity conservation     | 2374.05  | 10497.03 | 4352.43   | 0.00               | 8199.52    | 931.00      |
| Cultural               | Recreation and                | 395.68   | 4841.20  | 2024.93   | 558.60             | 10465.06   | 558.60      |

|          |         |          |          |          |           |           |         |
|----------|---------|----------|----------|----------|-----------|-----------|---------|
| services | culture |          |          |          |           |           |         |
| Total    |         | 18387.25 | 65449.30 | 27161.93 | -13238.60 | 110486.69 | 3235.23 |

8 Table S7 Land use and ESV transfer matrix of Ningxia from 2000 to 2030 unit:km<sup>2</sup>、10<sup>9</sup>CNY/km2

| Scenarios |                     |      | Cropland | Woodland | Grassland | Construction land | Water Area | Unused land |
|-----------|---------------------|------|----------|----------|-----------|-------------------|------------|-------------|
| 2000-2020 | Cropland            | Area | —        | 1602.90  | 1216.26   | 1049.95           | 105.24     | 140.16      |
|           |                     | ESV  | —        | 75.44    | 10.67     | -33.21            | 9.69       | -2.12       |
|           | Woodland            | Area | 1147.49  | —        | 1300.12   | 157.09            | 47.17      | 93.82       |
|           |                     | ESV  | -54.00   | —        | -49.78    | -12.36            | 2.12       | -5.84       |
|           | Grassland           | Area | 4011.91  | 4041.70  | —         | 835.86            | 170.04     | 925.89      |
|           |                     | ESV  | -35.20   | 154.75   | —         | -33.77            | 14.17      | -22.15      |
|           | Construction land   | Area | 323.20   | 110.64   | 164.73    | —                 | 28.29      | 27.78       |
|           |                     | ESV  | 10.22    | 8.71     | 6.66      | —                 | 3.50       | 0.46        |
|           | Water Area          | Area | 318.45   | 88.28    | 68.23     | 65.56             | —          | 10.79       |
|           |                     | ESV  | -29.33   | -3.98    | -5.68     | -8.11             | —          | -1.16       |
|           | Unused land         | Area | 1039.54  | 811.41   | 2881.54   | 280.56            | 176.19     | —           |
|           |                     | ESV  | 15.75    | 50.48    | 68.95     | -4.62             | 18.90      | —           |
|           | Total ESV increase  |      | 25.97    | 289.37   | 86.27     | 0.00              | 48.38      | 0.46        |
|           | Total ESV reduction |      | -118.54  | -3.98    | -55.46    | -92.07            | 0.00       | -31.27      |
| 2020-ND   | Cropland            | Area | —        | 211.53   | 82.76     | 71.15             | 0.08       | 0.00        |
|           |                     | ESV  | —        | 16.41    | 1.33      | -7.43             | 0.00       | -0.24       |
|           | Woodland            | Area | 360.60   | —        | 168.68    | 29.60             | 0.03       | 0.00        |
|           |                     | ESV  | -12.15   | —        | -4.84     | -5.04             | 0.00       | -0.81       |
|           | Grassland           | Area | 2288.76  | 1600.83  | —         | 248.86            | 47.33      | 0.00        |
|           |                     | ESV  | -13.57   | 42.43    | —         | -15.98            | 0.00       | -12.24      |
|           | Construction land   | Area | 0.00     | 0.00     | 0.00      | —                 | 0.00       | 0.00        |
|           |                     | ESV  | 7.46     | 7.70     | 1.90      | —                 | 0.00       | 0.11        |
|           | Water Area          | Area | 1.08     | 0.23     | 22.89     | 4.09              | —          | 0.00        |
|           |                     | ESV  | -4.13    | -0.69    | -0.01     | -0.85             | —          | 0.00        |
|           | Unused land         | Area | 0.60     | 0.36     | 0.00      | 0.20              | 0.00       | —           |
|           |                     | ESV  | 3.61     | 9.07     | 4.94      | -5.55             | 0.00       | —           |
|           | Total ESV increase  |      | 11.07    | 75.6     | 8.16      | 0.00              | 0.00       | 0.11        |
|           | Total ESV reduction |      | -29.85   | -0.69    | -4.85     | -34.85            | 0.00       | -13.30      |
| 2020-RED  | Cropland            | Area | —        | 211.53   | 82.76     | 71.15             | 0.08       | 0.00        |
|           |                     | ESV  | —        | 9.96     | 0.73      | -2.25             | 0.01       | 0.00        |
|           | Woodland            | Area | 360.60   | —        | 168.68    | 29.60             | 0.03       | 0.00        |
|           |                     | ESV  | -16.97   | —        | -6.46     | -2.33             | 0.00       | 0.00        |
|           | Grassland           | Area | 2288.76  | 1600.83  | —         | 248.86            | 47.33      | 0.00        |
|           |                     | ESV  | -20.08   | 61.29    | —         | -10.05            | 3.94       | 0.00        |
|           | Construction land   | Area | 0.00     | 0.00     | 0.00      | —                 | 0.00       | 0.00        |
|           |                     | ESV  | 0.00     | 0.00     | 0.00      | —                 | 0.00       | 0.00        |
|           | Water Area          | Area | 1.08     | 0.23     | 22.89     | 4.09              | —          | 0.00        |
|           |                     | ESV  | -0.10    | -0.01    | -1.91     | -0.51             | —          | 0.00        |
|           | Unused land         | Area | 0.60     | 0.36     | 0.00      | 0.20              | 0.00       | —           |
|           |                     | ESV  | 0.01     | 0.02     | 0.00      | 0.00              | 0.00       | —           |
|           | Total ESV increase  |      | 0.01     | 71.27    | 0.73      | 0.00              | 3.95       | 0.00        |
|           | Total ESV reduction |      | -37.15   | -0.01    | -8.37     | -15.14            | 0.00       | 0.00        |
| 2020-ELP  | Cropland            | Area | —        | 7.62     | 4.66      | 0.00              | 0.00       | 0.02        |
|           |                     | ESV  | —        | 0.36     | 0.04      | 0.00              | 0.00       | 0.00        |
|           | Woodland            | Area | 28.38    | —        | 185.27    | 0.00              | 0.07       | 0.40        |
|           |                     | ESV  | -1.34    | —        | -7.09     | 0.00              | 0.00       | -0.02       |
|           | Grassland           | Area | 664.83   | 3852.98  | —         | 0.00              | 57.64      | 698.08      |
|           |                     | ESV  | -5.83    | 147.52   | —         | 0.00              | 4.80       | -16.70      |
|           | Construction land   | Area | 0.00     | 1.20     | 0.00      | —                 | 0.00       | 0.00        |
|           |                     | ESV  | 0.00     | 0.09     | 0.00      | —                 | 0.00       | 0.00        |

|         |                     |      |        |         |        |        |       |        |
|---------|---------------------|------|--------|---------|--------|--------|-------|--------|
| 2020-SD | Water Area          | Area | 4.93   | 25.83   | 18.86  | 0.00   | —     | 0.12   |
|         |                     | ESV  | -0.45  | -1.16   | -1.57  | 0.00   | —     | -0.01  |
|         | Unused land         | Area | 113.47 | 1102.23 | 312.20 | 0.00   | 11.18 | —      |
|         |                     | ESV  | 1.72   | 68.57   | 7.47   | 0.00   | 1.20  | —      |
|         | Total ESV increase  |      | 1.72   | 216.55  | 7.51   | 0.00   | 6.01  | 0.00   |
|         | Total ESV reduction |      | -7.62  | -1.16   | -8.66  | 0.00   | 0.00  | -16.74 |
|         | Cropland            | Area | —      | 8.57    | 4.48   | 18.04  | 0.00  | 0.02   |
|         |                     | ESV  | —      | 0.40    | 0.04   | -0.57  | 0.00  | 0.00   |
|         | Woodland            | Area | 26.89  | —       | 154.46 | 51.30  | 0.05  | 0.30   |
|         |                     | ESV  | -1.27  | —       | -5.91  | -4.04  | 0.00  | -0.02  |
|         | Grassland           | Area | 669.81 | 3584.82 | —      | 263.02 | 62.56 | 658.79 |
|         |                     | ESV  | -5.88  | 137.25  | —      | -10.63 | 5.21  | -15.76 |
|         | Construction land   | Area | 15.38  | 23.60   | 13.02  | —      | 0.01  | 0.04   |
|         |                     | ESV  | 0.49   | 1.86    | 0.53   | —      | 0.00  | 0.00   |
|         | Water Area          | Area | 4.77   | 26.47   | 18.24  | 4.68   | —     | 1.15   |
|         |                     | ESV  | -0.44  | -1.19   | -1.52  | -0.58  | —     | -0.12  |
|         | Unused land         | Area | 113.57 | 1032.25 | 296.27 | 46.83  | 11.86 | —      |
|         |                     | ESV  | 1.72   | 64.22   | 7.09   | -0.77  | 1.27  | —      |
|         | Total ESV increase  |      | 2.21   | 203.73  | 7.65   | 0.00   | 6.49  | 0.00   |
|         | Total ESV reduction |      | -7.58  | -1.19   | -7.43  | -16.58 | 0.00  | -15.91 |
